# Supplementary material for: Identification of Antimotilins, Novel Inhibitors of Helicobacter pylori Flagellar Motility That Inhibit Stomach Colonization in a Mouse Model
Source: PubMed Central journal article supplement (PMC8941896; doi:10.1128/mbio.03755-21), 2022-03-01
Supplement: mbio.03755-21-st003.pdf [file mbio.03755-21-st003.pdf]

|                 | Among     | Within   | Total   |
|-----------------|-----------|----------|---------|
| group1a group2a |           |          |         |
| SS              | 0.176704  | 2.11979  | 2.2965  |
| df              | 1         | 18       | 19      |
| MS              | 0.176704  | 0.117766 |         |
| Fc              | 1.50046   |          |         |
| p value: 0.183  |           |          |         |
| group1b group2b |           |          |         |
| SS              | 0.0995619 | 1.91754  | 2.01711 |
| df              | 1         | 18       | 19      |
| MS              | 0.0995619 | 0.10653  |         |
| Fc              | 0.934589  |          |         |
| p value: 0.44   |           |          |         |
| group1b group3b |           |          |         |
| SS              | 0.124857  | 2.30859  | 2.43345 |
| df              | 1         | 18       | 19      |
| MS              | 0.124857  | 0.128255 |         |
| Fc              | 0.973504  |          |         |
| p value: 0.423  |           |          |         |
| group1b group4b |           |          |         |
| SS              | 0.0856737 | 2.17826  | 2.26393 |
| df              | 1         | 18       | 19      |
| MS              | 0.0856737 | 0.121014 |         |
| Fc              | 0.707962  |          |         |
| p value: 0.708  |           |          |         |
| group1b group5b |           |          |         |
| SS              | 0.113696  | 1.97407  | 2.08777 |
| df              | 1         | 16       | 17      |
| MS              | 0.113696  | 0.12338  |         |
| Fc              | 0.921516  |          |         |
| p value: 0.441  |           |          |         |
| group1b group6b |           |          |         |
| SS              | 0.223538  | 2.14301  | 2.36654 |
| df              | 1         | 16       | 17      |
| MS              | 0.223538  | 0.133938 |         |
| Fc              | 1.66896   |          |         |
| p value: 0.119  |           |          |         |
| group2b group3b |           |          |         |
| SS              | 0.0539685 | 2.04744  | 2.10141 |
| df              | 1         | 18       | 19      |
| MS              | 0.0539685 | 0.113747 |         |
| Fc              | 0.474463  |          |         |
| p value: 0.877  |           |          |         |
| group2b group4b |           |          |         |
| SS              | 0.236564  | 1.91711  | 2.15367 |
| df              | 1         | 18       | 19      |
| MS              | 0.236564  | 0.106506 |         |
| Fc              | 2.22114   |          |         |
| p value: 0.043  |           |          |         |
| group2b group5b |           |          |         |
| SS              | 0.0727183 | 1.71292  | 1.78564 |
| df              | 1         | 16       | 17      |
| MS              | 0.0727183 | 0.107057 |         |
| Fc              | 0.679246  |          |         |
| p value: 0.646  |           |          |         |
| group2b group6b |           |          |         |
| SS              | 0.289721  | 1.88185  | 2.17157 |
| df              | 1         | 16       | 17      |
| MS              | 0.289721  | 0.117616 |         |
| Fc              | 2.46328   |          |         |
| p value: 0.033  |           |          |         |
| group3b group4b |           |          |         |
| SS              | 0.275136  | 2.30815  | 2.58329 |
| df              | 1         | 18       | 19      |
| MS              | 0.275136  | 0.128231 |         |
| Fc              | 2.14563   |          |         |
| p value: 0.056  |           |          |         |
| group3b group5b |           |          |         |
| SS              | 0.0737357 | 2.10397  | 2.1777  |
| df              | 1         | 16       | 17      |
| MS              | 0.0737357 | 0.131498 |         |
| Fc              | 0.560737  |          |         |
| p value: 0.779  |           |          |         |
| group3b group6b |           |          |         |
| SS              | 0.296059  | 2.2729   | 2.56896 |
| df              | 1         | 16       | 17      |
| MS              | 0.296059  | 0.142056 |         |
| Fc              | 2.08409   |          |         |
| p value: 0.082  |           |          |         |
| group4b group5b |           |          |         |
| SS              | 0.217601  | 1.97363  | 2.19124 |
| df              | 1         | 16       | 17      |
| MS              | 0.217601  | 0.123352 |         |
| Fc              | 1.76406   |          |         |
| p value: 0.097  |           |          |         |
| group4b group6b |           |          |         |
| SS              | 0.148816  | 2.14257  | 2.29138 |
| df              | 1         | 16       | 17      |
| MS              | 0.148816  | 0.133911 |         |
| Fc              | 1.11131   |          |         |
| p value: 0.324  |           |          |         |
| group5b group6b |           |          |         |
| SS              | 0.222487  | 1.93838  | 2.16087 |
| df              | 1         | 14       | 15      |
| MS              | 0.222487  | 0.138456 |         |
| Fc              | 1.60692   |          |         |
| p value: 0.165  |           |          |         |

**Supplemental Table S3:** statistics using AMOVA (Bray-Curtis) of 16S amplicon-based microbiota analyses (beta-diversity) of fecal pellets from Active2-treated mice and controls. The statistical analyses indicate no significant difference of the intestinal commensal microbiota composition (beta-diversity) between groups before or after the experimental course. Animal groups 1 through 6 are numbered as outlined in Table 3; additional group designation a: fecal microbiota before start of experiment after acclimatization period; additional group designation b: fecal microbiota after experimental course. P values of the respective comparisons are shaded in blue (non-significantly different) or light orange (trend towards significance). Differences between all mouse groups before the experiments (a) were also not significant; only one pairwise comparison between groups 1a and 6a as one representative comparison is listed for the pre-experimental status.
